# Supplementary material for: p-Hydroxybenzoic acid-assisted homochiral 1D-helical coordination polymers from calcium cations and cucurbit[5]uril
Source: Royal Society of Chemistry journal article supplement (doi:10.1039/c2ce25958c), 2012-01-01
Supplement: c2ce25958c.pdf [file c2ce25958c.pdf]

## Supporting Information

### *p*-Hydroxybenzoic acid-assisted homochiral 1D-helical coordination polymers from calcium cation and cucurbit[5]uril

Kai Chen, Li-Li Liang, Hao-Jing Liu, Zhu Tao,\* Sai-Feng Xue, Yun-Qian Zhang, Qian-Jiang Zhu

Key Laboratory of Macrocyclic and Supramolecular Chemistry of Guizhou Province, Guizhou University, Guiyang 550025, People's Republic of China

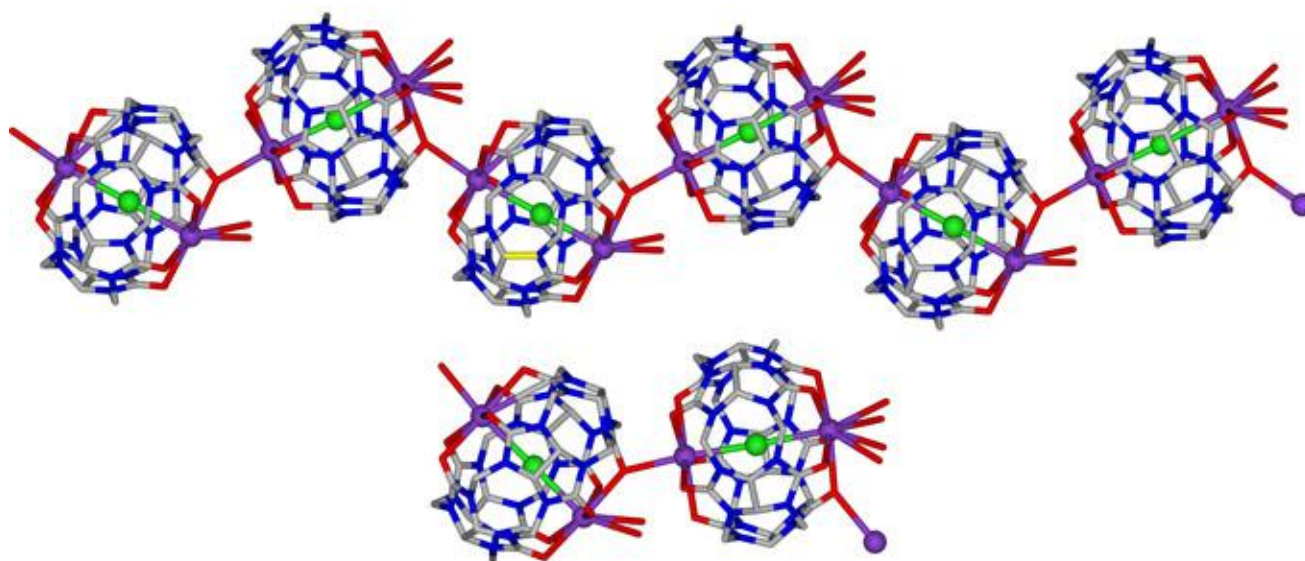

SI-Figure 1 (a) a linear supramolecular chain constructed of Q[5]-K<sup>+</sup> molecular capsules linked by a extra K-O<sub>carbonyl</sub> bonds; (b) view of the Q[5]-K<sup>+</sup> molecular capsules.

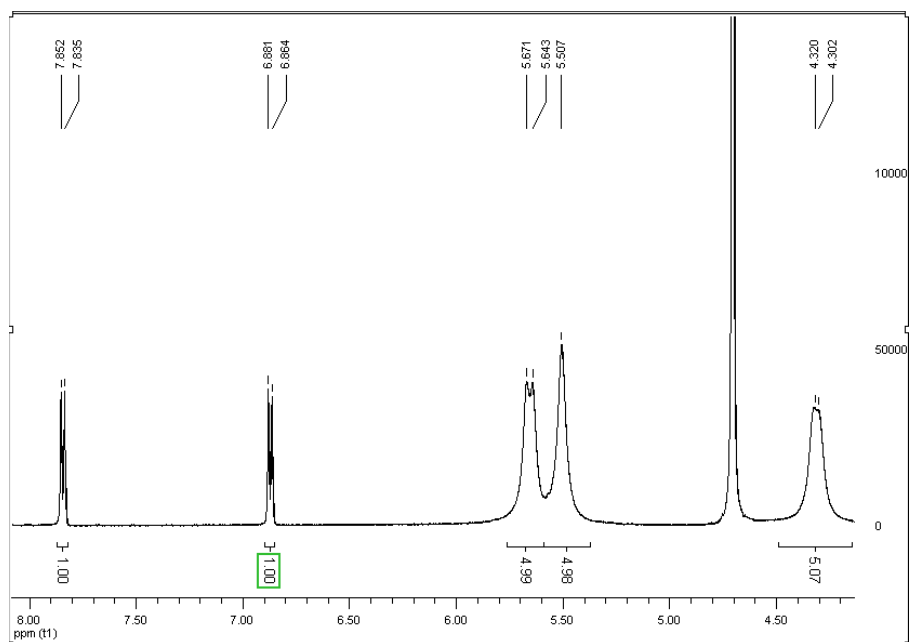

SI-Figure 2 <sup>1</sup>H NMR of the compound **3** in D<sub>2</sub>O at 20°C

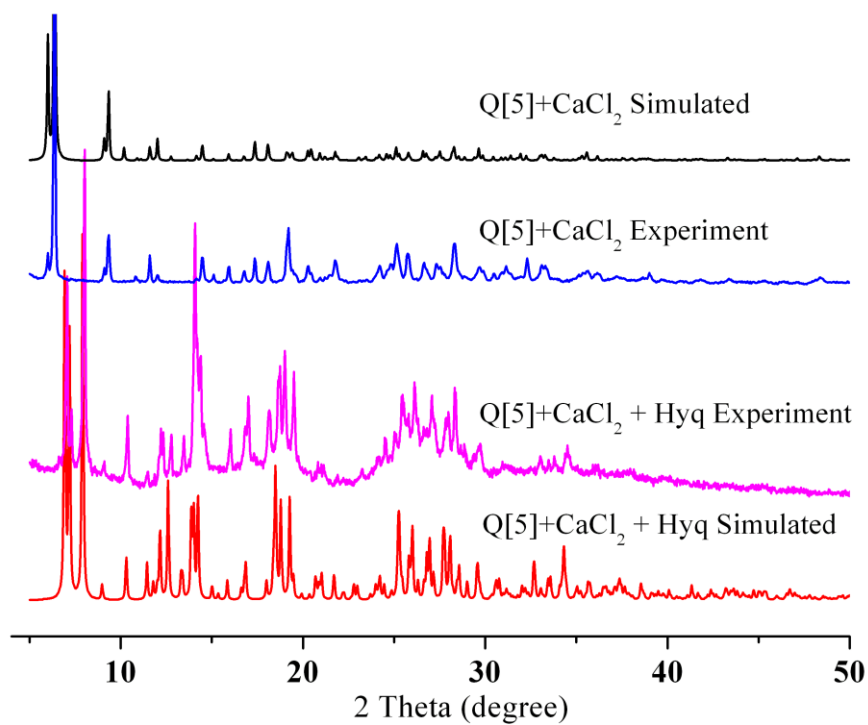

SI-Figure 3 PXRD of the compound **1** and **3**: as simulated from single crystal XRD data, and as synthesized.

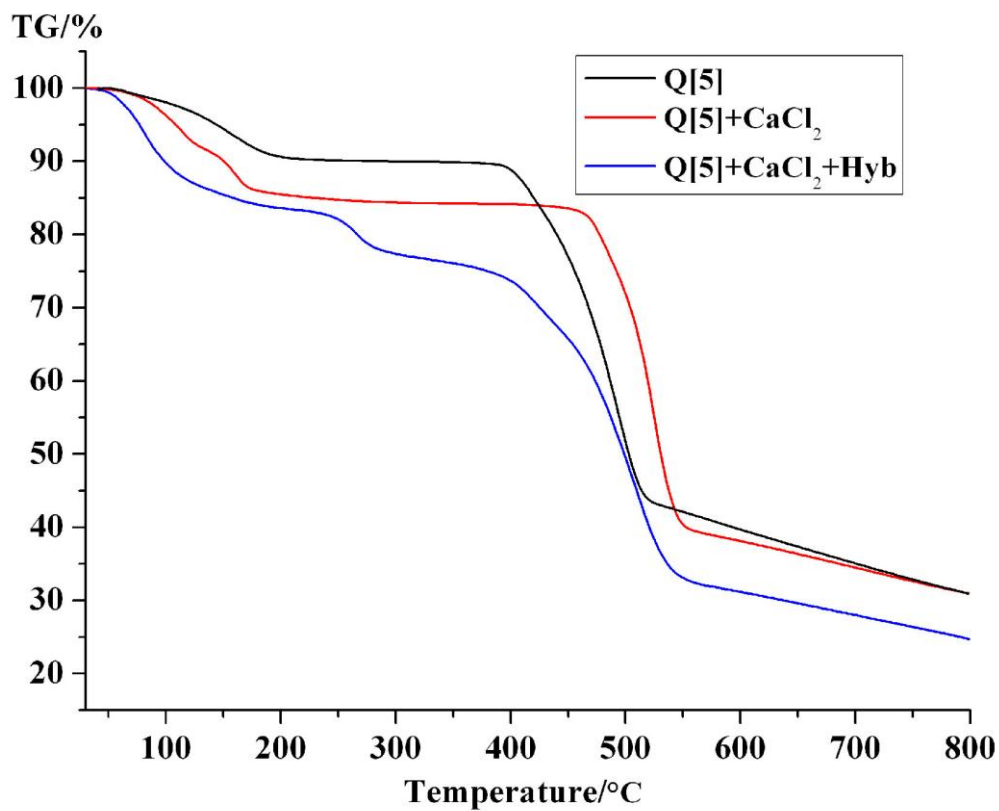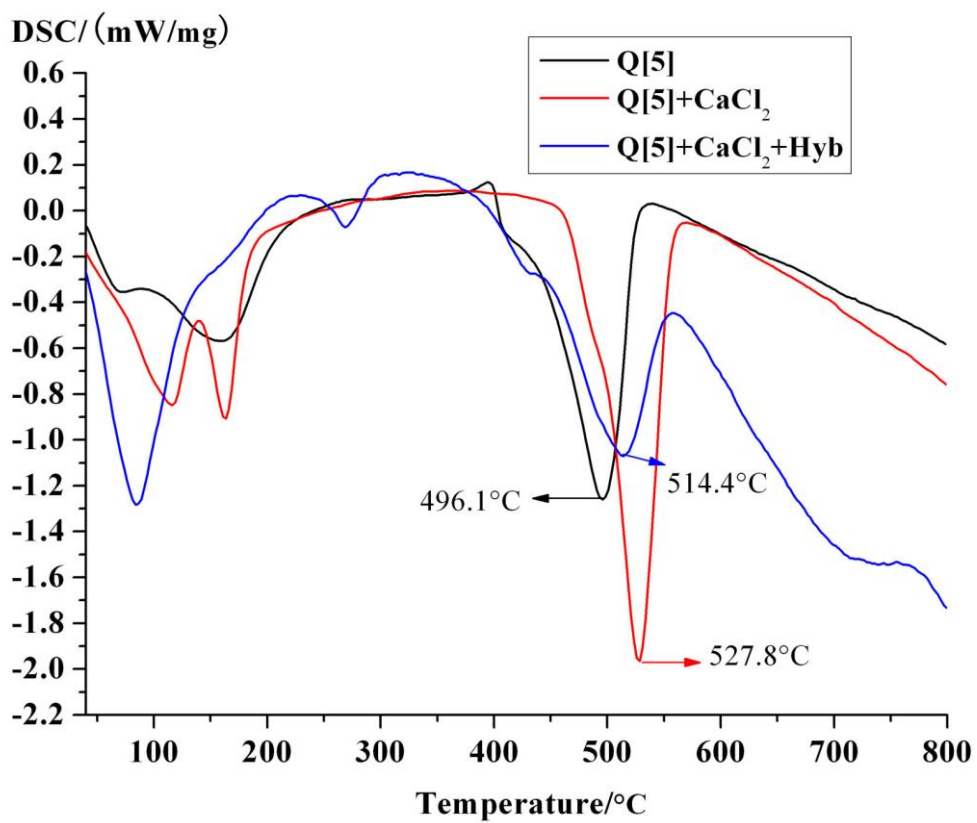

SI-Figure 4 DSC and TG curves of the compound 1 and 3 in N<sub>2</sub>
